# Supplementary material for: Consortia of Plant-Growth-Promoting Rhizobacteria Isolated from Halophytes Improve Response of Eight Crops to Soil Salinization and Climate Change Conditions
Source: MDPI journal article supplement (doi:10.3390/agronomy11081609), 2021-08-13
Supplement: s1 [file s1]

## Supplementary Materials

### Confocal microscopy analyses

Biofertilizer 1 was the only one to demonstrate endophytic capacity in rice roots.

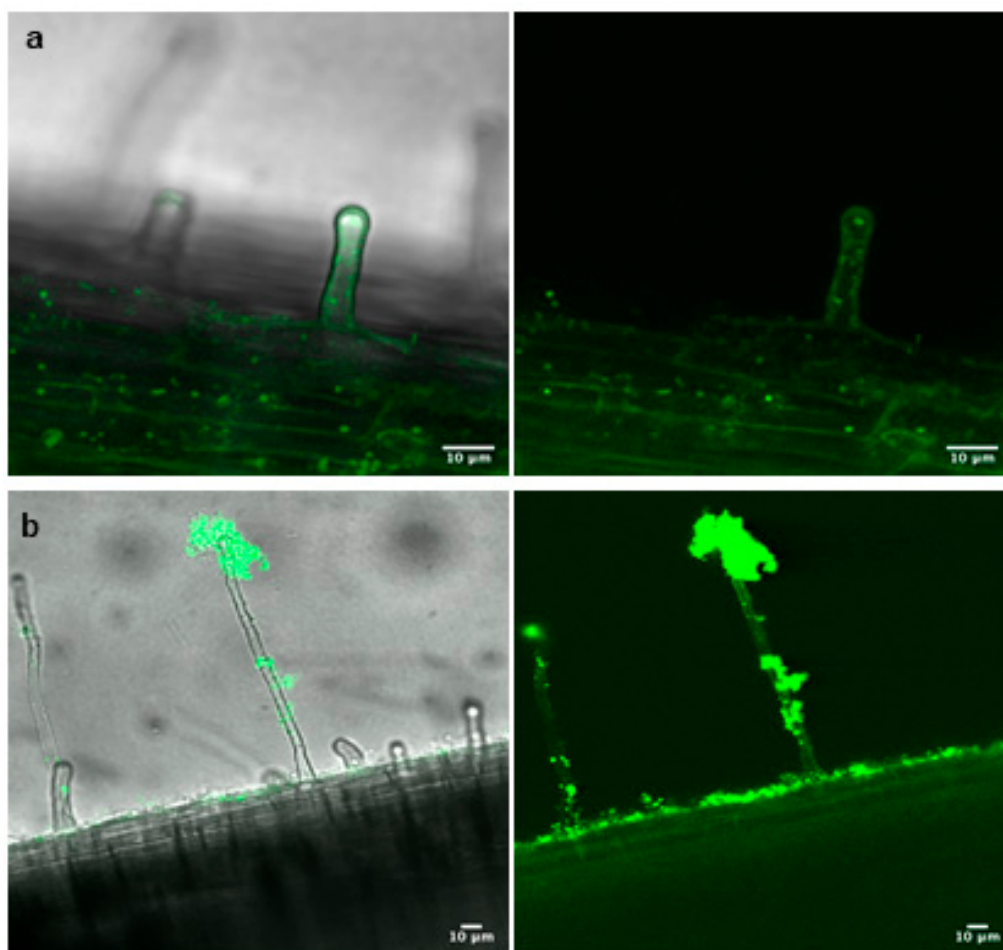

**Figure S1.** Biofertilizers in the rice roots. (a) Micrographs showing the localization of rhizobacterial consortia 1 and 3 (b) by confocal microscopy in rice roots. In each panel, merged images from the rhizobacteria fluorescence and bright-field illumination are shown at the top. Fluorescence of both bacteria and plant membranes is shown at the bottom. Brightness and contrast were enhanced to improve visibility. Scale bar, 10  $\mu\text{m}$ .

### Material and Methods

To determine bacterial association to rice roots, two roots were excised from each plant ( $n=2$  per treatment) and washed with tap water before incubation for 10 min at RT in a solution containing the fluorescent probe FM 1–43 (0.1 mg/ml DMSO; Molecular Probes). This dye, specifically staining membranes, is commonly used to visualize the shape of a cell by confocal microscopy (Mariscal et al., 2016). The root samples were washed twice with tap water prior to mounting on a glass slide. Samples were examined with a Leica TCS SP2 confocal microscope using a HCX PLAM-APO  $\times 63$  1.4 NA oil immersion objective. FM 1–43; fluorescence was excited with 488 nm irradiation from an Argon laser, and fluorescence emission was monitored across windows of 510–543 nm. Z series containing 90 to 130 frames were stacked and processed with the Image J program (version 1.41).
